# Supplementary material for: Optimized Mass Spectrometry Detection of Thyroid Hormones and Polar Metabolites in Rodent Cerebrospinal Fluid
Source: Metabolites. 2024 Jan 23;14(2):79. doi: 10.3390/metabo14020079 (PMC10890085; doi:10.3390/metabo14020079)
Supplement: Supplementary file 1 [file metabolites-14-00079-s001.zip › supplemental_data_S1.csv]

Name	Adduct type	Retention	Formula	M/Z
1,4-BUTANEDIAMINE	M+H	2.64	C4H12N2	89.10732
1,4-BUTANEDIAMINE_13C4	M+H	2.64	[13]C4H12N2	93.12074
1-methylnicotinamide	M+H	12.02		137.0709
2,3-BPG	M-H	12.7	C3H8O10P2	264.952
2-aminobutyric acid	M+H	7.96	C4H9NO2	104.071
2-hydroxybutyric acid	M-H	4.1	C4H8O3	103.0401
2-hydroxyglutarate	M-H	10.2	C5H8O5	147.0299
2-oxoadipate	M-H	9.8	C6H8O5	159.0299
2-oxobutyric acid	M-H	3.73	C4H6O3	101.0244
3-hydroxybutyric acid	M-H	4.9	C4H8O3	103.0401
3-hydroxyisobutyric acid	M-H	5.5	C4H8O3	103.0401
3-methyl-2-oxopentanoic acid	M-H	2.49	C6H10O3	129.0557
3-phosphoglycerate	M-H	11.26	C3H7O7P	184.9857
3-ureidopropionate	M+H	7.85	C4H8N2O3	133.0608
4-Hydroxyphenylpyruvic acid	M-H	3.97		179.035
5,10-CH2-H4PteGlu	M+H	10	C20H24N7O6	458.17881
5,10-CH=H4PteGlu	M+H	10.7	C20H22N7O6	456.16316
5-CH3-H4PteGlu	M+H	9.4	C20H26N7O6	460.19446
5/10-CHO-H4PteGlu	M+H	9.84	C20H24N7O7	474.17372
6-phosphogluconate	M-H	12.58	C6H13O10P	275.0174
acetoacetate	M-H	4.23	C4H6O3	101.0244
Acetyl CoA	M+H	8.17	C23H38N7O17P3S	810.133
acetylalanine	M+H	4.7	C5H9NO3	132.066
acetylaspartate	M+H	9.9	C6H9NO5	176.055
acetylcarnitine	M+H	5.56	C9H17NO4	204.123
acetylglutamate	M+H	9.62	C7H11NO5	190.071
acetylglycine	M-H	5.75	C4H7NO3	116.0348
acetylserine	M-H	6.56	C5H9NO4	146.0459
adenine	M+H	4.51	C5H5N5	136.0618
adenosine	M+H	4.1	C10H13N5O4	268.104
ADP	M-H	10	C10H15N5O10P2	426.0221
ADP-ribose	M-H	10.47	C15H23N5O14P2	558.0644
AICAR	M-H	10.35	C9H15N4O8P	337.0555
alanine	M+H	9.02	C3H7NO2	90.055
alanine-13C3-15N	M+H	9.02	[13]C3H7[15]NO2	94.0621
allantoin	M-H	8.27	C4H6N4O3	157.0367
alpha-keto-isovalerate	M-H	2.85	C5H8O3	115.0401
Alpha-Ketoglutarate	M-H	13.17	C5H6O5	145.0143
ALPHA-KETOGLUTARIC ACID_1,2,3,4- 13C4	M-H	10.34	[13]C4C1H6O5	149.02767
Alpha-Lipoic Acid	M-H	2.8	C8H14O2S2	205.0362
amidoadipate	M+H	10.06	C6H11NO4	162.076
AMP	M-H	9.3	C10H14N5O7P	346.0558
anserine	M+H	8.61	C10H16N4O3	241.1295
anthranilic acid	M-H	4	C7H7NO2	136.0404
arginine	M+H	14.23	C6H14N4O2	175.119
arginine-13C6-15N4	M+H	14.23	[13]C6H14[15]N4O2	185.1273
argininosuccinate	M+H	11.47	C10H18N4O6	291.1299
ascorbate	M-H	9.56	C6H8O6	175.0248
asparagine	M+H	9.32	C4H8N2O3	133.0608
aspartate	M-H	9.93	C4H7NO4	132.0302
aspartate-13C6-15N4	M-H	9.93	[13]C4H7[15]NO4	137.0407
asymmetric dimethylarginine (ADMA)	M+H	11.75	C8H18N4O2	203.151
ATP	M-H	10.85	C10H16N5O13P3	505.9885
beta-alanine	M+H	9.45	C3H7NO2	90.055
betaine	M+H	5.94	C5H11NO2	118.0863
biotin	M+H	4.49	C10H16N2O3S	245.095
Butyrylcarnitine	M+H	3.54	C11H21NO4	232.1543
C5 Carnitines	M+H	3.26	C12H23NO4	246.17
cAMP	M+H	5.24	C10H12N5O6P	330.0598
carnitine	M+H	7.68	C7H15NO3	162.1125
carnosine	M+H	9.44	C9H14N4O3	227.1139
CDP	M-H	11.84	C9H15N3O11P2	402.0109
CDP-choline	M+H	10.01	C14H27N4O11P2	490.1173
Chenodeoxycholic acid	M-H	2.31		391.2854
Cholic acid	M-H	2.55		407.2803
choline	M+H	9.04	C5H14NO	104.107
cis-aconitate	M-H	12.15	C6H6O6	173.0092
citrate	M-H	12.2	C6H8O7	191.0197
CITRIC ACID_1,5,6-CARBOXYL-13C3	M-H	12.15	[13]C3C3H8O7	194.02979
citrulline	M+H	9.73	C6H13N3O3	176.103
CMP	M-H	10.6	C9H14N3O8P	322.0446
CoA-Ellmans	M-H	10		963.0866
Coenzyme A	M+H	8.9	C21H36N7O16P3S	768.1225
creatine	M+H	8.78	C4H9N3O2	132.0768
creatinine	M+H	4.56	C4H7N3O	114.0662
CREATININE_N-METHYL-D3	M+H	4.54	C4H4D3N3O	117.08502
CTP	M-H	13	C9H16N3O14P3	481.9772
Cys_Ell	M-H	8.2		316.9912
Cys_Gly_Ell	M-H	0		374.0126
cystathionine	M+H	10.91	C7H14N2O4S	223.0747
cysteic acid	M-H	10.48	C3H7NO5S	167.99722
cysteine-glycine	M+H	6.6		179.048
cysteine_13C3_15N1	M+H	3.8	[13]C3H7[15]NO2S	126.03413
cysteine	M+H	3.8	C3H7NO2S	122.02703
cystine	M+H	10.41	C6H12N2O4S2	241.0311
cystine-13C6-15N2	M+H	10.4	[13]C6H12[15]N2O4S2	249.04532
cytidine	M+H	6.4	C9H13N3O5	244.0928
cytosine	M+H	5.88	C4H5N3O	112.0505
dATP	M+H	10.25	C10H16N5O12P3	492.0081
dCTP	M-H	11.47	C9H16N3O13P3	465.98232
dCytidine	M+H	5.15	C9H13N3O4	228.098
Deoxycholic acid	M-H	2.31		391.2854
dihydroorotate	M+H	7.33	C5H6N2O4	159.04
dihydroxyacetone phosphate	M-H	10.44	C3H7O6P	168.9908
dimethylglicine	M+H	6.9	C4H9NO2	104.071
dTMP	M-H	8.54	C10H15N2O8P	321.0493
dTTP	M-H	11.4	C10H17N2O14P3	480.982
dUMP	M-H	9.64	C9H13N2O8P	307.0337
erythrose 4-phosphate	M-H	11.35	C4H9O7P	199.0013
ETHANOLAMINE_1,1,2,2-D4	M+H	10.34	C2H3D4NO	66.08515
F6P/G1P	M-H	10.6	C6H13O9P	259.0224
FAD	M-H	7.14	C27H33N9O15P2	784.1499
folic acid	M+H	11.4	C19H19N7O6	442.147
formyl methionine	M-H	3.3	C6H11NO3S	176.0387
fructose	M-H	7.86	C6H12O6	179.05611
Fructose 1,6-bisphosphate	M+H	12.12	C6H14O12P2	341.0033
fumarate	M-H	10.64	C4H4O4	115.0037
FUMARIC ACID_13C4	M-H	10.75	[13]C4H4O4	119.0171
gamma-aminobutyric acid	M+H	9.43	C4H9NO2	104.071
gamma-glutamyl-alanine	M+H	9.53	C8H15N3O4	219.098
GAR	M-H	11.21	C7H15N2O8P	285.0493
GDP	M-H	12.4	C10H15N5O11P2	442.017
glucose	M-H	9.04	C6H12O6	179.0561
Glucose 6-phosphate	M-H	11.28	C6H13O9P	259.0224
glutamate	M-H	9.78	C5H9NO4	146.0459
glutamate-13C5,15N	M-H	9.78	[13]C5H9[15]NO4	152.0597
glutamine	M+H	9.15	C5H10N2O3	147.0764
glyceraldehyde 3-phosphate	M-H	11.35	C3H7O6P	168.9908
glycerate	M-H	7.46	C3H6O4	105.0193
Glycerol 3-Phosphate	M+H	9.86	C3H9O6P	173.021
Glycerophosphocholine	M+H	8.75	C8H20NO6P	258.1101
glycine	M+H	9.74	C2H5NO2	76.0393
glycine_13C2-15N	M+H	9.7	[13]C2H5[15]NO2	79.043
GMP	M-H	11.21	C10H14N5O8P	362.0507
GSH	M+H	9.59	C10H17N3O6S	308.0911
GSH-13C2_15N	M+H	9.6	[13]C2C15H21[15]N1N3O10S2	509.08093
GSH_13C2-15N-Ellmans	M-H	10		506.058
GSH_Ellmans	M-H	10	C17H21N4O10S2	503.0552
GSSG	M+H	11.95	C20H32N6O12S2	613.1592
GSSG-13C4_15N2	M+H	11.9	[13]C4C16H32[15]N2N4O12S2	619.16673
GTP	M-H	12.93	C10H16N5O14P3	521.9834
guanidinoacetate	M+H	9.6	C3H7N3O2	118.0611
guanine	M+H	6.9	C5H5N5O	152.0567
guanosine	M+H	7.23	C10H13N5O5	284.0989
GUANOSINE_15N5	M+H	7.2	C10H13[15]N5O5	289.08412
H2PteGlu	M+H	10.5	C19H22N7O6	444.16316
H4PteGlu	M+H	10	C19H24N7O6	446.17881
HIAA	M+H	8.44	C10H9NO3	192.06552
histidine	M+H	8.94	C6H9N3O2	156.0768
histidine-13C6-15N3	M+H	8.94	[13]C6H9[15]N3O2	165.088
HoCy_Ell	M+H	8		333.0213
homocitrulline	M+H	9.4	C7H15N3O3	190.119
homocysteic acid	M-H	12.72	C4H9NO5S	182.01287
homocysteine	M+H	7.45	C4H9NO2S	136.0427
Homocysteine sulfinic acid	M-H	9.86	C4H9NO4S	166.01795
hydroxyproline_gammaALA	M-H	8.9	C5H9NO3	130.05097
hypotaurine	M+H	9.12	C2H7NO2S	110.027
hypoxanthine	M+H	5.19	C5H4N4O	137.0458
HYPOXANTHINE_13C5	M+H	5.2	[13]C5H4N4O	142.06256
IMP	M+H	10.43	C10H13N4O8P	349.054
INDOLE-3-ACETIC ACID	M-H	4.55	C3H5O6P	174.0561
INDOLE-3-ACETIC ACID_PHENYL-13C6	M-H	4.55	[13]C6C4H9NO2	180.07618
indolelactate	M+H	3.85	C11H11NO3	206.081
inosine	M+H	6.05	C10H12N4O5	269.0881
isocitrate	M-H	14.13	C6H8O7	191.01973
isoleucine	M+H	5.88	C6H13NO2	132.1019
Isoleucine-13C6-15N	M+H	5.88	[13]C6H13[15]NO2	139.1191
Itaconic Acid	M-H	10.1	C5H6O4	129.0193
Kynurenic Acid	M+H	3.2	C10H7NO3	190.0499
kynurenine	M+H	5.26	C10H12N2O3	209.0921
L-ALANINE_13C3	M+H	8.9	[13]C3H7[15]NO2	94.06205
L-LEUCINE_13C6	M+H	5.3	[13]C6H13NO2	138.12203
L-PHENYLALANINE_RING-13C6	M+H	4.8	[13]C6C3H11NO2	172.10638
L-TRYPTOPHAN_13C11	M+H	6.15	[13]C11H12N2O2	216.13406
L-TYROSINE_RING-13C6	M+H	7.5	[13]C6C3H11NO3	188.1013
lactic acid	M-H	5.46	C3H6O3	89.0244
leucine	M+H	5.48	C6H13NO2	132.1019
leucine-13C6-15N	M+H	5.48	[13]C6H13[15]NO2	139.1191
lysine	M+H	13.89	C6H14N2O2	147.1128
lysine-13C6-15N2	M+H	13.89	[13]C6H14[15]N2O2	155.127
Lythocholic acid	M-H	2.14	C24H40O3	375.29047
malate	M-H	10.81	C4H6O5	133.0143
malonyl-CoA	M+H	10.77	C24H38N7O19P3S	854.12288
mannose	M-H	8.4	C6H12O6	179.056
methionine	M+H	6.12	C5H11NO2S	150.0583
Methionine sulfoxide	M+H	7.98	C5H11NO3S	166.0531
methionine-13C5-15N	M+H	6.1	[13]C5H11[15]NO2S	156.0721
methylthioadenosine	M+H	2.72	C11H15N5O3S	298.0968
MTX	M+H	10.08	C20H22N8O5	455.17859
myo-inositol	M-H	10.8	C6H12O6	179.056
N-acetylcysteine	M-H	4.3	C5H9NO3S	162.0231
N-acetylglutamate	M+H	9.93	C7H11NO5	190.071
N-acetylglutamine	M+H	6.29	C7H12N2O4	189.087
N-acetyllysine	M+H	7.58	C8H16N2O3	189.12337
N-acetylmethionine	M+H	3	C7H13NO3S	192.0689
N-acetylornithine	M+H	9.65	C7H14N2O3	175.1077
N-acetylphenylalanine	M+H	2.34	C11H13NO3	208.0968
NAD+	M+H	9.34	C21H27N7O14P2	664.1164
NADH	M+H	8.85	C21H29N7O14P2	666.13205
NADP	M+H	11.14	C21H29N7O17P3	744.0827
NADPH	M+H	11.44	C21H30N7O17P3	746.0984
niacinamide	M+H	3.03	C6H6N2O	123.0553
NICOTINAMIDE_13C6	M+H	3.35	[13]C6H6N2O	129.07542
Nicotinic Acid	M+H	4.2	C6H5NO2	124.0393
O-phosphoethanolamine	M-H	10.67	C2H8NO4P	140.012
ornithine	M+H	12.58	C5H12N2O2	133.0972
orotate	M-H	6.7	C5H4N2O4	155.0098
p-aminobenzoate	M-H	6.29	C7H7NO2	136.04
palmitate	M-H	2.05	C16H32O2	255.233
PALMITATE_U-13C16	M-H	2.05	C3H4O3	271.2867
Pantothenate	M+H	5.3	C9H17NO5	220.118
Phenylacetyl glutamine	M+H	3	C13H16N2O4	265.1183
phenylalanine	M-H	4.7	C9H11NO2	164.0717
phenylalanine-13C9-15N	M+H	4.7	[13]C9H11[15]NO2	176.1135
phosphocholine	M+H	10.17	C5H14NO4P	184.0733
phosphocreatine	M+H	9.85	C4H10N3O5P	212.0431
phosphoenolpyruvate	M-H	11.8	C3H5O6P	166.9751
phosphoethanolamine	M+H	11	C2H8NO4P	142.0264
phosphoserine	M-H	11.28	C3H8NO6P	184.0017
Picolinate	M+H	4.36	C6H4NO2	124.039
Pipecolate	M+H	6.8	C6H11NO2	130.0863
proline	M+H	7.23	C5H9NO2	116.0706
proline-13C5-15N	M+H	7.28	[13]C5H9[15]NO2	122.0844
propionylcarnitine	M+H	4.74	C10H19NO4	218.1387
PRPP	M-H	13.21	C5H13O14P3	388.9445
pseudouridine	M-H	6.91	C9H12N2O6	243.0623
PteGlu	M+H	11.33	C19H20N7O6	442.14751
Pyridoxal	M+H	3.76	C8H9NO3	168.065
Pyridoxine	M+H	3.64	C8H11NO3	170.081
pyruvate	M-H	4.3	C3H4O3	87.0088
PYRUVATE_13C3	M-H	4.35	[13]C3H4O3	90.01883
quinolinic acid	M-H	10.38	C7H5NO4	166.01458
Riboflavin	M+H	3.49	C17H20N4O6	377.116
Ribose 1-phosphate	M-H	10.37	C5H11O8P	229.0119
Ribose/Ribulose 5-phosphate/3Me-Lys	M-H	10.54	C5H11O8P	229.0119
S-Adenosyl-L-Homocysteine	M+H	7.8	C14H20N6O5S	385.1289
S-Adenosyl-L-methionine	M+H	9.94	C15H22N6O5S	399.1445
S-methylcysteine	M+H	6.69	C4H9NO2S	136.0427
saccharopine	M+H	10.54	C11H20N2O6	277.1394
sarcosine	M+H	8.68	C3H7NO2	90.055
sarcosine	M+H	8.48	C3H7NO2	90.055
Sedoheptulose-7-phosphate	M-H	11.04	C7H15O10P	289.033
serine	M+H	9.59	C3H7NO3	106.0499
serine-13C3-15N	M+H	9.59	[13]C3H7[15]NO3	110.057
serotonin	M+H	14.04	C10H12N2O	177.10224
SODIUM PALMITATE_U-13C16	M-H	2.05	[13]C16H32O2	271.28663
sorbitol	M-H	8.2	C6H14O6	181.0718
succinate	M-H	10.19	C4H6O4	117.0193
succinyl-CoA	M+H	10.34	C7H13NO3S	868.1385
Succinylacetone	M-H	3.36	C7H10O4	157.05063
taurine	M-H	9.26	C2H7NO3S	124.0074
thiamine	M-H	6.64	C12H16N4OS	263.0972
threonine	M+H	8.61	C4H9NO3	120.0655
threonine-13C4-15N	M+H	8.61	[13]C4H9[15]NO3	125.076
thymidine	M-H	3.06	C10H14N2O5	241.08299
THYMINE	M+H	5.1	C5H6N2O2	127.0502
THYMINE_1,3-15N2	M+H	5.1	C5H6[15]N2O2	129.04427
trans-urocanate	M+H	6.53	C6H6N2O2	139.05
tryptamine	M+H	11.4	C10H12N2	161.10732
tryptophan	M+H	6.16	C11H12N2O2	205.0972
tyrosine	M+H	7.58	C9H11NO3	182.0812
tyrosine-13C9-15N	M+H	7.58	[13]C9H11[15]NO3	192.1084
UDP	M-H	11.09	C9H14N2O12P2	402.99492
UDP-GlcNAc	M+H	10.1	C17H27N3O17P2	608.0888
UDP-hexose	M-H	11.08	C15H24N2O17P2	565.0478
UMP	M-H	10.15	C9H13N2O9P	323.0286
uracil	M-H	4.15	C4H4N2O2	111.02
Ureidosuccinic acid	M-H	11.24	C5H8N2O5	175.036
uric acid	M-H	7.97	C5H4N4O3	167.0211
uridine	M-H	4.81	C9H12N2O6	243.0623
UTP	M-H	12.13	C9H15N2O15P3	482.9613
valine	M+H	7	C5H11NO2	118.0863
valine-13C5-15N	M+H	7.01	[13]C5H11[15]NO2	124.1001
xanthine	M-H	7.15	C5H4N4O2	151.0262
xanthosine	M-H	7.8	C10H12N4O6	283.0684
